# Supplementary material for: Susceptibility-guided therapy for Helicobacter pylori infection treatment failures
Source: PubMed Central journal article supplement — Ther Adv Gastroenterol. 2019 Sep 9;12:1756284819874922. doi: 10.1177/1756284819874922 (PMC6734621; doi:10.1177/1756284819874922), 2019-09-09
Supplement: Supplementary_Data.pdf [file Supplementary_Data.pdf]

## Supplementary data

**Table S1. Combinations of antibiotics used in patients**

| <b>Antibiotics used in prior treatments</b> | <b>1 treatment failure (n=40)</b> | <b>2 treatment failures (n=79)</b> | <b>≥3 treatment failures (n=81)</b> |
|---------------------------------------------|-----------------------------------|------------------------------------|-------------------------------------|
| AMO/CLA                                     | 10 (25%)                          | 11 (13.9%)                         | 0                                   |
| AMO/MTZ                                     | 2 (5%)                            | 5 (6.3%)                           | 0                                   |
| AMO/LEV                                     | 1 (2.5%)                          | 2 (2.5%)                           | 0                                   |
| CLA/MTZ                                     | 16 (40%)                          | 5 (6.3%)                           | 0                                   |
| MTZ/LEV                                     | 2 (5%)                            | 1 (1.3%)                           | 0                                   |
| CLA/LEV                                     | 6 (15%)                           | 2 (2.5%)                           | 0                                   |
| CLA/MTZ/LEV                                 | 0                                 | 5 (6.3%)                           | 6 (7.4%)                            |
| AMO/CLA/MTZ                                 | 0                                 | 18 (22.8%)                         | 16 (19.8%)                          |
| AMO/CLA/LEV                                 | 0                                 | 20 (25.3%)                         | 13 (16%)                            |
| AMO/MTZ/LEV                                 | 0                                 | 1 (1.3%)                           | 1 (1.2%)                            |
| AMO/CLA/MTZ/LEV                             | 0                                 | 2 (2.5%)                           | 31 (38.3%)                          |
| AMO/MTZ/LEV/GEN                             | 0                                 | 0                                  | 1 (1.2%)                            |
| AMO/CLA/MTZ/GEN                             | 0                                 | 0                                  | 1 (1.2%)                            |
| AMO/CLA/MTZ/TET                             | 0                                 | 0                                  | 2 (2.5%)                            |
| AMO/CLA/MTZ/FUR                             | 0                                 | 0                                  | 2 (2.5%)                            |
| AMO/CLA/MTZ/LEV/FUR                         | 0                                 | 0                                  | 4 (4.9%)                            |
| AMO/CLA/MTZ/TET/FUR                         | 0                                 | 0                                  | 1 (1.2%)                            |
| Other                                       | 1 (2.5%)                          | 3 (3.8%)                           | 3 (3.7%)                            |
| Unknown                                     | 2 (5%)                            | 4 (5.1%)                           | 0                                   |

Data are n (%). AMO, amoxicillin; CLA, clarithromycin; MTZ, metronidazole; LEV, levofloxacin; TET, tetracycline; GEN, gentamicin; FUR, furazolidone.
